# Supplementary material for: Absorption and electrochromic modulation of near-infrared light: realized by tungsten suboxide
Source: Royal Society of Chemistry journal article supplement (doi:10.1039/c5nr09147k), 2016-01-01
Supplement: c5nr09147k1.pdf [file c5nr09147k1.pdf]

## Supporting Information

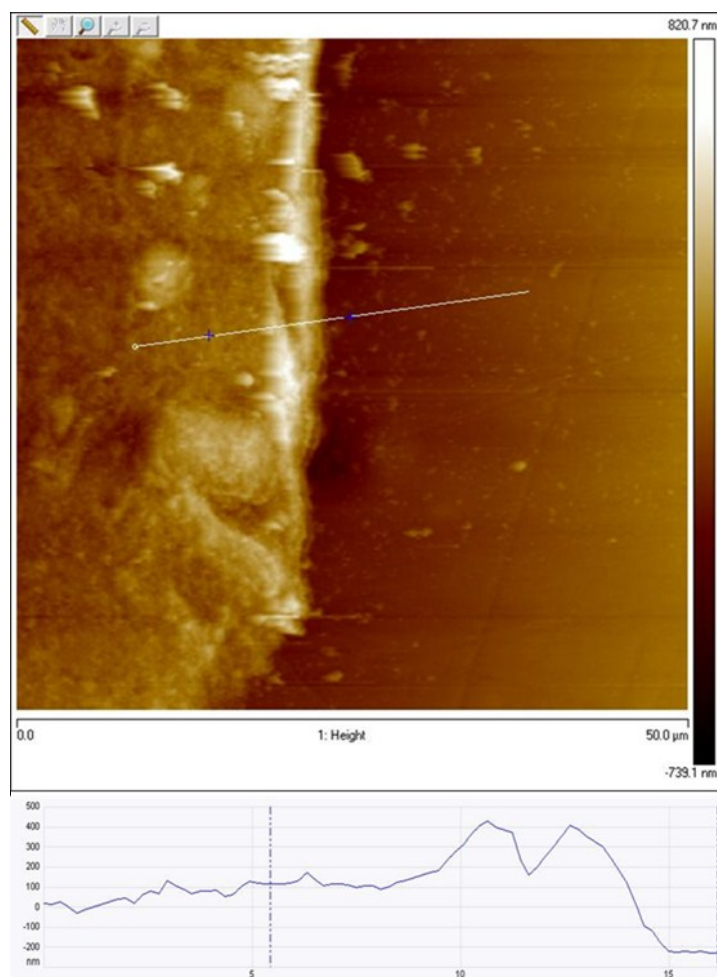

Fig. S1 The AFM image of  $W_{18}O_{49}$  needle film coated on quartz glass and line analysis for determining the thickness.

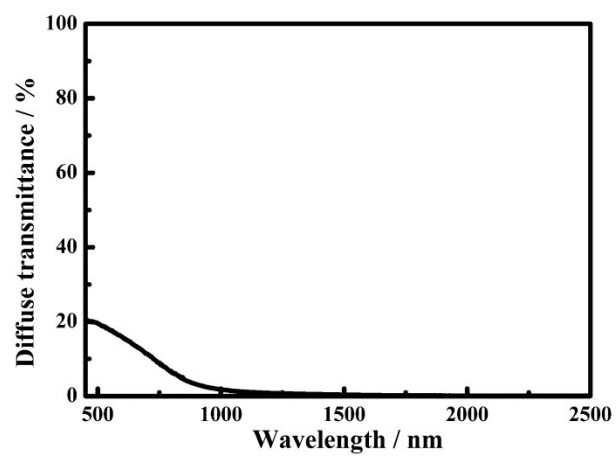

Fig. S2 Diffuse transmittance of  $W_{18}O_{49}$  nanoneedle film

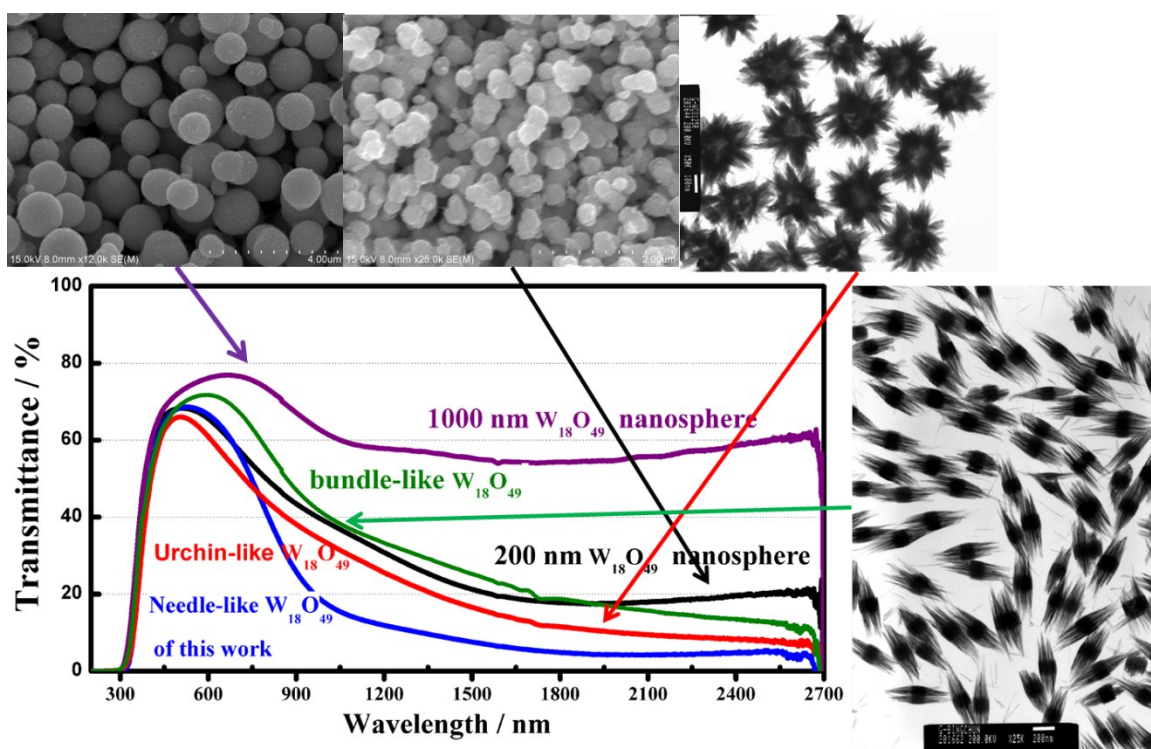

Fig. S3 Comparative study on near shielding properties between needle-like  $W_{18}O_{49}$  of this work and other  $W_{18}O_{49}$  nanostructures. The synthesis method of different shaped  $W_{18}O_{49}$  is according to *Inorg. Chem.* 2012, 51, 4763–4771.

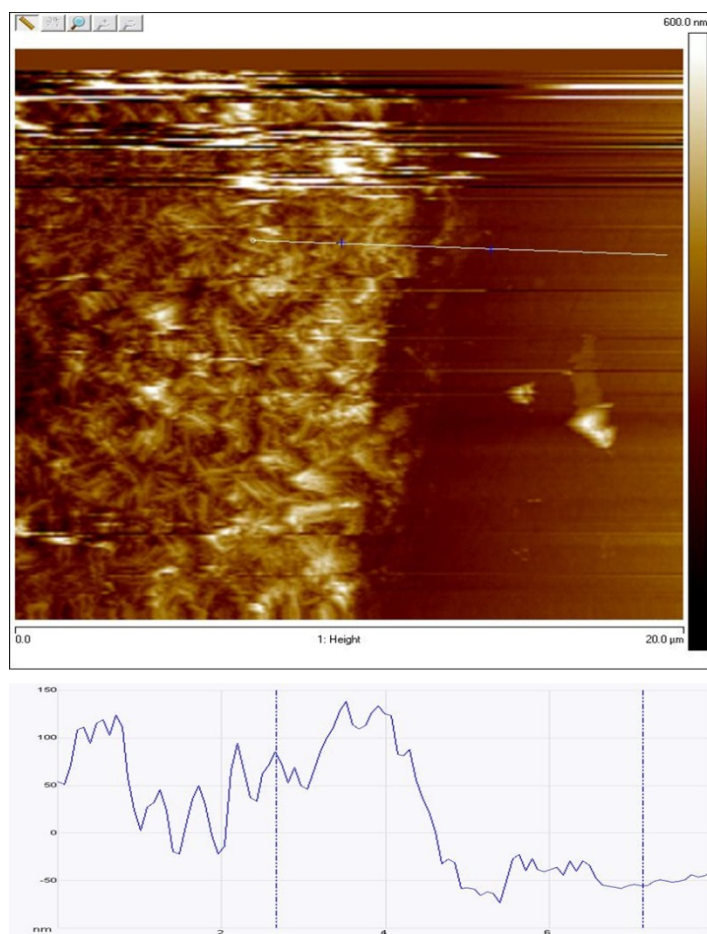

Fig. S4 AFM image of  $W_{18}O_{49}$  needle film deposited by LBL method and corresponding line analysis for determining the thickness.

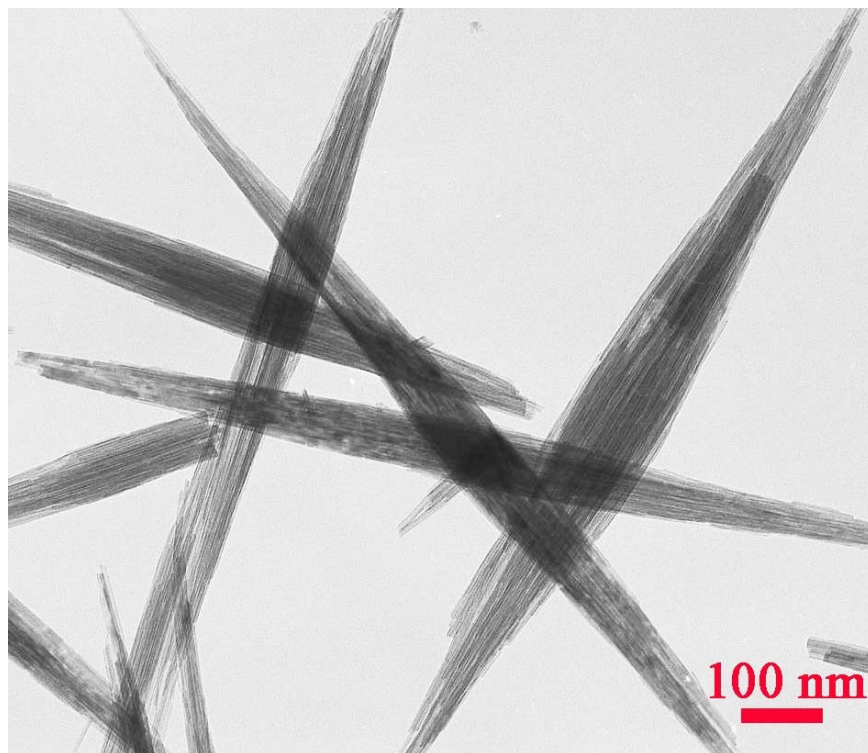

Fig. S5 Enlarged TEM image of needle-like  $\text{W}_{18}\text{O}_{49}$  in this work.
